# Supplementary material for: Nischarin regulates focal adhesion and Invadopodia formation in breast cancer cells
Source: Springer Nature journal article supplement (doi:10.1186/s12943-018-0764-6), 2018-02-07

# Supplementary Figure 1

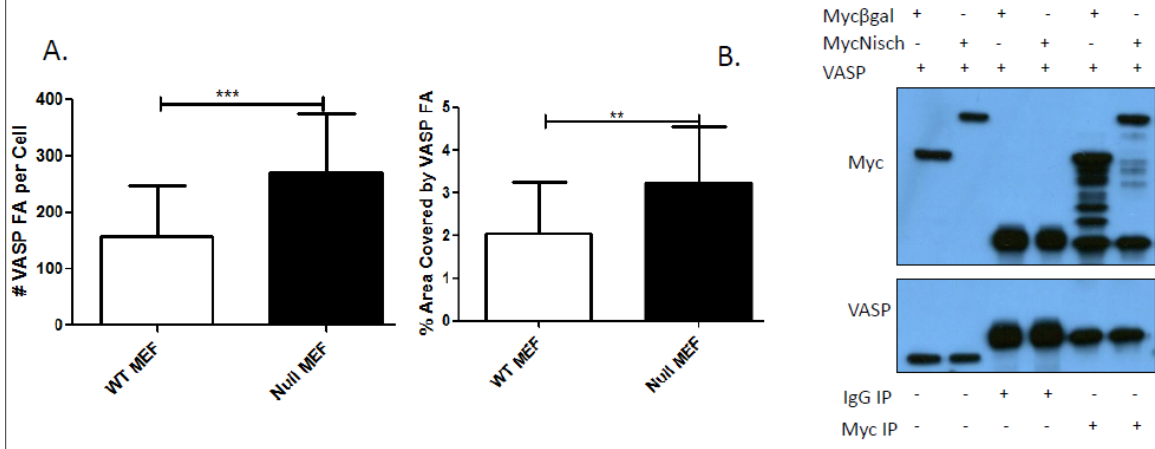

Supplement: MOESM1 [file 15445960]
